# Supplementary material
Source: publisher site journal article supplement (https://www.dovepress.com/get_supplementary_file.php?f=358070.docx)
Supplement: Supplementary file 1 [file get_supplementary_file.php]

1. ***SEARCH STRATEGY:***

**PUBMED – LILACS via BVS/VHL (**[**https://pesquisa.bvsalud.org/portal/advanced/?lang=en**](https://pesquisa.bvsalud.org/portal/advanced/?lang=en)**) incorporated by LILACS**

((2-(2-Chlorophenyl)-2-(methylamino)cyclohexanone OR CI 581 OR CI-581 OR CI581 OR Calipsol OR Calypsol OR Kalipsol OR Ketalar OR Ketamine Hydrochloride OR Ketanest OR Ketaset) AND (neuralgia OR Nerve Pain Neuralgia OR Atypical Neuralgia OR Iliohypogastric Nerve Neuralgia OR Ilioinguinal Neuralgia OR Perineal Neuralgia OR Stump Neuralgia OR Supraorbital Neuralgia OR Vidian Neurodynia OR Neuropathic Pain OR Paroxysmal Nerve Pain OR Sciatica OR Neuralgia, Sciatic OR Sciatic Neuralgia OR Sciatica, Bilateral OR Trigeminal Neuralgia OR Epileptiform Neuralgia OR Fothergill Disease OR Secondary Trigeminal Neuralgia OR Tic Douloureux OR Trifacial Neuralgia OR Trigeminal Neuralgia, Idiopathic OR Trigeminal Neuralgia, Secondary OR Facial Neuralgia OR Craniofacial Pain Syndromes OR Facial Pain Syndromes OR Myofacial Pain Syndromes OR Sphenopalatine Neuralgia OR Brachial Plexus Neuritis OR Amyotrophic Neuralgia OR Amyotrophy, Hereditary Neuralgic OR Amyotrophy, Hereditary Neuralgic, with Predilection for Brachial Plexus OR Amyotrophy, Neuralgic OR Brachial Neuralgia OR Brachial Neuritis OR Brachial Plexus Neuropathy, Hereditary OR Cervico-Brachial Neuralgia OR Cervicobrachial Neuralgia OR Familial Brachial Plexus Neuritis OR Hereditary Brachial Plexus Neuropathy OR Hereditary Neuralgic Amyotrophy OR Heredofamilial Neuritis with Brachial Plexus Predilection OR Neuralgia, Amyotrophic OR Neuralgic Amyotrophy OR Neuritis With Brachial Predilection OR Neuritis, Brachial Plexus OR Parsonage-Aldren-Turner Syndrome OR Parsonage-Turner Syndrome OR Shoulder Girdle Neuropathy OR Shoulder-Girdle Neuropathy))

**CENTRAL – COCHRANE**

#1= [Ketamine] explode all trees

#2= [Neuralgia] explode all trees

#3 = #1 and #2

**EMBASE**

Query('2-(2-chlorophenyl)-2-(methylamino)cyclohexanone'/exp OR '2-(2-chlorophenyl)-2-(methylamino)cyclohexanone' OR 'ci 581'/exp OR 'ci 581' OR 'ci-581'/exp OR 'ci-581' OR 'ci581'/exp OR 'ci581' OR 'calipsol'/exp OR calipsol OR 'calypsol'/exp OR calypsol OR 'kalipsol'/exp OR kalipsol OR 'ketalar'/exp OR ketalar OR 'ketamine hydrochloride'/exp OR 'ketamine hydrochloride' OR 'ketanest'/exp OR ketanest OR 'ketaset'/exp OR ketaset) AND ('neuralgia'/exp OR neuralgia OR 'nerve pain neuralgia' OR 'atypical neuralgia' OR 'iliohypogastric nerve neuralgia' OR 'ilioinguinal neuralgia'/exp OR 'ilioinguinal neuralgia' OR 'perineal neuralgia' OR 'stump neuralgia'/exp OR 'stump neuralgia' OR 'supraorbital neuralgia'/exp OR 'supraorbital neuralgia' OR 'vidian neurodynia' OR 'neuropathic pain'/exp OR 'neuropathic pain' OR 'paroxysmal nerve pain' OR 'sciatica'/exp OR sciatica OR 'neuralgia, sciatic' OR 'sciatic neuralgia'/exp OR 'sciatic neuralgia' OR 'sciatica, bilateral' OR 'trigeminal neuralgia'/exp OR 'trigeminal neuralgia' OR 'epileptiform neuralgia'/exp OR 'epileptiform neuralgia' OR 'fothergill disease' OR 'secondary trigeminal neuralgia' OR 'tic douloureux'/exp OR 'tic douloureux' OR 'trifacial neuralgia'/exp OR 'trifacial neuralgia' OR 'trigeminal neuralgia, idiopathic' OR 'trigeminal neuralgia, secondary' OR 'facial neuralgia'/exp OR 'facial neuralgia' OR 'craniofacial pain syndromes' OR 'facial pain syndromes' OR 'myofacial pain syndromes' OR 'sphenopalatine neuralgia'/exp OR 'sphenopalatine neuralgia' OR 'brachial plexus neuritis'/exp OR 'brachial plexus neuritis' OR 'amyotrophic neuralgia' OR 'amyotrophy, hereditary neuralgic' OR 'amyotrophy, hereditary neuralgic, with predilection for brachial plexus' OR 'amyotrophy, neuralgic' OR 'brachial neuralgia'/exp OR 'brachial neuralgia' OR 'brachial neuritis'/exp OR 'brachial neuritis' OR 'brachial plexus neuropathy, hereditary' OR 'cervico-brachial neuralgia'/exp OR 'cervico-brachial neuralgia' OR 'cervicobrachial neuralgia'/exp OR 'cervicobrachial neuralgia' OR 'familial brachial plexus neuritis' OR 'hereditary brachial plexus neuropathy' OR 'hereditary neuralgic amyotrophy'/exp OR 'hereditary neuralgic amyotrophy' OR 'heredofamilial neuritis with brachial plexus predilection' OR 'neuralgia, amyotrophic' OR 'neuralgic amyotrophy'/exp OR 'neuralgic amyotrophy' OR 'neuritis with brachial predilection' OR 'neuritis, brachial plexus'/exp OR 'neuritis, brachial plexus' OR 'parsonage-aldren-turner syndrome' OR 'parsonage-turner syndrome' OR 'shoulder girdle neuropathy' OR 'shoulder-girdle neuropathy') AND [embase]/lim NOT ([embase]/lim AND [medline]/lim)

*ALL SEARCHES HAVE BEEN CONDUCTED FROM INCEPTION TO LATEST DATE

((((("2"[All Fields] AND "2-Chlorophenyl"[All Fields]) AND "2"[All Fields]) AND "methylamino"[All Fields]) AND ("cyclohexanone"[Supplementary Concept] OR "cyclohexanone"[All Fields] OR "cyclohexanones"[MeSH Terms] OR "cyclohexanones"[All Fields])) OR ("ketamine"[MeSH Terms] OR "ketamine"[All Fields] OR "ci 581"[All Fields]) OR ("ketamine"[MeSH Terms] OR "ketamine"[All Fields] OR "ci 581"[All Fields]) OR ("ketamine"[MeSH Terms] OR "ketamine"[All Fields] OR "ci581"[All Fields]) OR ("ketamine"[MeSH Terms] OR "ketamine"[All Fields] OR "calipsol"[All Fields]) OR ("ketamine"[MeSH Terms] OR "ketamine"[All Fields] OR "calypsol"[All Fields]) OR ("ketamine"[MeSH Terms] OR "ketamine"[All Fields] OR "kalipsol"[All Fields]) OR ("esketamine"[Supplementary Concept] OR "esketamine"[All Fields] OR "ketamine"[All Fields] OR "ketamine"[MeSH Terms] OR "ketamin"[All Fields] OR "ketalar"[All Fields] OR "ketamine s"[All Fields] OR "ketamines"[All Fields]) OR ("ketamine"[MeSH Terms] OR "ketamine"[All Fields] OR ("ketamine"[All Fields] AND "hydrochloride"[All Fields]) OR "ketamine hydrochloride"[All Fields]) OR ("ketamine"[MeSH Terms] OR "ketamine"[All Fields] OR "ketanest"[All Fields]) OR ("esketamine"[Supplementary Concept] OR "esketamine"[All Fields] OR "ketamine"[All Fields] OR "ketamine"[MeSH Terms] OR "ketamin"[All Fields] OR "ketaset"[All Fields] OR "ketamine s"[All Fields] OR "ketamines"[All Fields])) AND ("neuralgia"[MeSH Terms] OR "neuralgia"[All Fields] OR "neuralgias"[All Fields] OR (("neuralgia"[MeSH Terms] OR "neuralgia"[All Fields] OR ("nerve"[All Fields] AND "pain"[All Fields]) OR "nerve pain"[All Fields]) AND ("neuralgia"[MeSH Terms] OR "neuralgia"[All Fields] OR "neuralgias"[All Fields])) OR ("neuralgia"[MeSH Terms] OR "neuralgia"[All Fields] OR ("atypical"[All Fields] AND "neuralgia"[All Fields]) OR "atypical neuralgia"[All Fields]) OR ("neuralgia"[MeSH Terms] OR "neuralgia"[All Fields] OR ("iliohypogastric"[All Fields] AND "nerve"[All Fields] AND "neuralgia"[All Fields])) OR ("neuralgia"[MeSH Terms] OR "neuralgia"[All Fields] OR ("ilioinguinal"[All Fields] AND "neuralgia"[All Fields]) OR "ilioinguinal neuralgia"[All Fields]) OR ("neuralgia"[MeSH Terms] OR "neuralgia"[All Fields] OR ("perineal"[All Fields] AND "neuralgia"[All Fields]) OR "perineal neuralgia"[All Fields]) OR ("neuralgia"[MeSH Terms] OR "neuralgia"[All Fields] OR ("stump"[All Fields] AND "neuralgia"[All Fields])) OR ("neuralgia"[MeSH Terms] OR "neuralgia"[All Fields] OR ("supraorbital"[All Fields] AND "neuralgia"[All Fields]) OR "supraorbital neuralgia"[All Fields]) OR ("Vidian"[All Fields] AND ("neuralgia"[MeSH Terms] OR "neuralgia"[All Fields] OR "neurodynia"[All Fields])) OR ("neuralgia"[MeSH Terms] OR "neuralgia"[All Fields] OR ("neuropathic"[All Fields] AND "pain"[All Fields]) OR "neuropathic pain"[All Fields]) OR ("neuralgia"[MeSH Terms] OR "neuralgia"[All Fields] OR ("paroxysmal"[All Fields] AND "nerve"[All Fields] AND "pain"[All Fields]) OR "paroxysmal nerve pain"[All Fields]) OR ("sciatica"[MeSH Terms] OR "sciatica"[All Fields] OR "sciaticas"[All Fields]) OR ("sciatica"[MeSH Terms] OR "sciatica"[All Fields] OR ("neuralgia"[All Fields] AND "sciatic"[All Fields]) OR "neuralgia sciatic"[All Fields]) OR ("sciatica"[MeSH Terms] OR "sciatica"[All Fields] OR ("sciatic"[All Fields] AND "neuralgia"[All Fields]) OR "sciatic neuralgia"[All Fields]) OR ("sciatica"[MeSH Terms] OR "sciatica"[All Fields] OR ("sciatica"[All Fields] AND "bilateral"[All Fields])) OR ("trigeminal neuralgia"[MeSH Terms] OR ("trigeminal"[All Fields] AND "neuralgia"[All Fields]) OR "trigeminal neuralgia"[All Fields]) OR ("trigeminal neuralgia"[MeSH Terms] OR ("trigeminal"[All Fields] AND "neuralgia"[All Fields]) OR "trigeminal neuralgia"[All Fields] OR ("epileptiform"[All Fields] AND "neuralgia"[All Fields]) OR "epileptiform neuralgia"[All Fields]) OR ("trigeminal neuralgia"[MeSH Terms] OR ("trigeminal"[All Fields] AND "neuralgia"[All Fields]) OR "trigeminal neuralgia"[All Fields] OR ("fothergill"[All Fields] AND "disease"[All Fields]) OR "fothergill disease"[All Fields]) OR ("trigeminal neuralgia"[MeSH Terms] OR ("trigeminal"[All Fields] AND "neuralgia"[All Fields]) OR "trigeminal neuralgia"[All Fields] OR ("secondary"[All Fields] AND "trigeminal"[All Fields] AND "neuralgia"[All Fields]) OR "secondary trigeminal neuralgia"[All Fields]) OR ("trigeminal neuralgia"[MeSH Terms] OR ("trigeminal"[All Fields] AND "neuralgia"[All Fields]) OR "trigeminal neuralgia"[All Fields] OR ("tic"[All Fields] AND "douloureux"[All Fields]) OR "tic douloureux"[All Fields]) OR ("trigeminal neuralgia"[MeSH Terms] OR ("trigeminal"[All Fields] AND "neuralgia"[All Fields]) OR "trigeminal neuralgia"[All Fields] OR ("trifacial"[All Fields] AND "neuralgia"[All Fields]) OR "trifacial neuralgia"[All Fields]) OR ("trigeminal neuralgia"[MeSH Terms] OR ("trigeminal"[All Fields] AND "neuralgia"[All Fields]) OR "trigeminal neuralgia"[All Fields] OR ("trigeminal"[All Fields] AND "neuralgia"[All Fields] AND "idiopathic"[All Fields]) OR "trigeminal neuralgia idiopathic"[All Fields]) OR ("trigeminal neuralgia"[MeSH Terms] OR ("trigeminal"[All Fields] AND "neuralgia"[All Fields]) OR "trigeminal neuralgia"[All Fields] OR ("trigeminal"[All Fields] AND "neuralgia"[All Fields] AND "secondary"[All Fields]) OR "trigeminal neuralgia secondary"[All Fields]) OR ("facial neuralgia"[MeSH Terms] OR ("facial"[All Fields] AND "neuralgia"[All Fields]) OR "facial neuralgia"[All Fields]) OR ("facial neuralgia"[MeSH Terms] OR ("facial"[All Fields] AND "neuralgia"[All Fields]) OR "facial neuralgia"[All Fields] OR ("craniofacial"[All Fields] AND "pain"[All Fields] AND "syndromes"[All Fields]) OR "craniofacial pain syndromes"[All Fields]) OR ("facial neuralgia"[MeSH Terms] OR ("facial"[All Fields] AND "neuralgia"[All Fields]) OR "facial neuralgia"[All Fields] OR ("facial"[All Fields] AND "pain"[All Fields] AND "syndromes"[All Fields]) OR "facial pain syndromes"[All Fields]) OR ("facial neuralgia"[MeSH Terms] OR ("facial"[All Fields] AND "neuralgia"[All Fields]) OR "facial neuralgia"[All Fields] OR ("myofacial"[All Fields] AND "pain"[All Fields] AND "syndromes"[All Fields]) OR "myofacial pain syndromes"[All Fields]) OR ("facial neuralgia"[MeSH Terms] OR ("facial"[All Fields] AND "neuralgia"[All Fields]) OR "facial neuralgia"[All Fields] OR ("sphenopalatine"[All Fields] AND "neuralgia"[All Fields]) OR "sphenopalatine neuralgia"[All Fields]) OR ("brachial plexus neuritis"[MeSH Terms] OR ("brachial"[All Fields] AND "plexus"[All Fields] AND "neuritis"[All Fields]) OR "brachial plexus neuritis"[All Fields]) OR ("brachial plexus neuritis"[MeSH Terms] OR ("brachial"[All Fields] AND "plexus"[All Fields] AND "neuritis"[All Fields]) OR "brachial plexus neuritis"[All Fields] OR ("amyotrophic"[All Fields] AND "neuralgia"[All Fields]) OR "amyotrophic neuralgia"[All Fields]) OR ("brachial plexus neuritis"[MeSH Terms] OR ("brachial"[All Fields] AND "plexus"[All Fields] AND "neuritis"[All Fields]) OR "brachial plexus neuritis"[All Fields] OR ("amyotrophy"[All Fields] AND "hereditary"[All Fields] AND "neuralgic"[All Fields])) OR ("brachial plexus neuritis"[MeSH Terms] OR ("brachial"[All Fields] AND "plexus"[All Fields] AND "neuritis"[All Fields]) OR "brachial plexus neuritis"[All Fields] OR ("amyotrophy"[All Fields] AND "hereditary"[All Fields] AND "neuralgic"[All Fields] AND "predilection"[All Fields] AND "brachial"[All Fields] AND "plexus"[All Fields])) OR ("brachial plexus neuritis"[MeSH Terms] OR ("brachial"[All Fields] AND "plexus"[All Fields] AND "neuritis"[All Fields]) OR "brachial plexus neuritis"[All Fields] OR ("amyotrophy"[All Fields] AND "neuralgic"[All Fields]) OR "amyotrophy neuralgic"[All Fields]) OR ("brachial plexus neuritis"[MeSH Terms] OR ("brachial"[All Fields] AND "plexus"[All Fields] AND "neuritis"[All Fields]) OR "brachial plexus neuritis"[All Fields] OR ("brachial"[All Fields] AND "neuralgia"[All Fields]) OR "brachial neuralgia"[All Fields]) OR ("brachial plexus neuritis"[MeSH Terms] OR ("brachial"[All Fields] AND "plexus"[All Fields] AND "neuritis"[All Fields]) OR "brachial plexus neuritis"[All Fields] OR ("brachial"[All Fields] AND "neuritis"[All Fields]) OR "brachial neuritis"[All Fields]) OR ("brachial plexus neuritis"[MeSH Terms] OR ("brachial"[All Fields] AND "plexus"[All Fields] AND "neuritis"[All Fields]) OR "brachial plexus neuritis"[All Fields] OR ("brachial"[All Fields] AND "plexus"[All Fields] AND "neuropathy"[All Fields] AND "hereditary"[All Fields])) OR ("brachial plexus neuritis"[MeSH Terms] OR ("brachial"[All Fields] AND "plexus"[All Fields] AND "neuritis"[All Fields]) OR "brachial plexus neuritis"[All Fields] OR ("cervico"[All Fields] AND "brachial"[All Fields] AND "neuralgia"[All Fields]) OR "cervico brachial neuralgia"[All Fields]) OR ("brachial plexus neuritis"[MeSH Terms] OR ("brachial"[All Fields] AND "plexus"[All Fields] AND "neuritis"[All Fields]) OR "brachial plexus neuritis"[All Fields] OR ("cervicobrachial"[All Fields] AND "neuralgia"[All Fields]) OR "cervicobrachial neuralgia"[All Fields]) OR ("brachial plexus neuritis"[MeSH Terms] OR ("brachial"[All Fields] AND "plexus"[All Fields] AND "neuritis"[All Fields]) OR "brachial plexus neuritis"[All Fields] OR ("familial"[All Fields] AND "brachial"[All Fields] AND "plexus"[All Fields] AND "neuritis"[All Fields])) OR ("brachial plexus neuritis"[MeSH Terms] OR ("brachial"[All Fields] AND "plexus"[All Fields] AND "neuritis"[All Fields]) OR "brachial plexus neuritis"[All Fields] OR ("hereditary"[All Fields] AND "brachial"[All Fields] AND "plexus"[All Fields] AND "neuropathy"[All Fields]) OR "hereditary brachial plexus neuropathy"[All Fields]) OR ("brachial plexus neuritis"[MeSH Terms] OR ("brachial"[All Fields] AND "plexus"[All Fields] AND "neuritis"[All Fields]) OR "brachial plexus neuritis"[All Fields] OR ("hereditary"[All Fields] AND "neuralgic"[All Fields] AND "amyotrophy"[All Fields]) OR "hereditary neuralgic amyotrophy"[All Fields]) OR ("brachial plexus neuritis"[MeSH Terms] OR ("brachial"[All Fields] AND "plexus"[All Fields] AND "neuritis"[All Fields]) OR "brachial plexus neuritis"[All Fields] OR ("heredofamilial"[All Fields] AND "neuritis"[All Fields] AND "brachial"[All Fields] AND "plexus"[All Fields] AND "predilection"[All Fields]) OR "heredofamilial neuritis with brachial plexus predilection"[All Fields]) OR ("brachial plexus neuritis"[MeSH Terms] OR ("brachial"[All Fields] AND "plexus"[All Fields] AND "neuritis"[All Fields]) OR "brachial plexus neuritis"[All Fields] OR ("neuralgia"[All Fields] AND "amyotrophic"[All Fields])) OR ("brachial plexus neuritis"[MeSH Terms] OR ("brachial"[All Fields] AND "plexus"[All Fields] AND "neuritis"[All Fields]) OR "brachial plexus neuritis"[All Fields] OR ("neuralgic"[All Fields] AND "amyotrophy"[All Fields]) OR "neuralgic amyotrophy"[All Fields]) OR ("brachial plexus neuritis"[MeSH Terms] OR ("brachial"[All Fields] AND "plexus"[All Fields] AND "neuritis"[All Fields]) OR "brachial plexus neuritis"[All Fields] OR ("neuritis"[All Fields] AND "brachial"[All Fields] AND "predilection"[All Fields]) OR "neuritis with brachial predilection"[All Fields]) OR ("brachial plexus neuritis"[MeSH Terms] OR ("brachial"[All Fields] AND "plexus"[All Fields] AND "neuritis"[All Fields]) OR "brachial plexus neuritis"[All Fields] OR ("neuritis"[All Fields] AND "brachial"[All Fields] AND "plexus"[All Fields])) OR ("brachial plexus neuritis"[MeSH Terms] OR ("brachial"[All Fields] AND "plexus"[All Fields] AND "neuritis"[All Fields]) OR "brachial plexus neuritis"[All Fields] OR ("parsonage"[All Fields] AND "aldren"[All Fields] AND "turner"[All Fields] AND "syndrome"[All Fields])) OR ("brachial plexus neuritis"[MeSH Terms] OR ("brachial"[All Fields] AND "plexus"[All Fields] AND "neuritis"[All Fields]) OR "brachial plexus neuritis"[All Fields] OR ("parsonage"[All Fields] AND "turner"[All Fields] AND "syndrome"[All Fields]) OR "parsonage turner syndrome"[All Fields]) OR ("brachial plexus neuritis"[MeSH Terms] OR ("brachial"[All Fields] AND "plexus"[All Fields] AND "neuritis"[All Fields]) OR "brachial plexus neuritis"[All Fields] OR ("shoulder"[All Fields] AND "girdle"[All Fields] AND "neuropathy"[All Fields]) OR "shoulder girdle neuropathy"[All Fields]) OR ("brachial plexus neuritis"[MeSH Terms] OR ("brachial"[All Fields] AND "plexus"[All Fields] AND "neuritis"[All Fields]) OR "brachial plexus neuritis"[All Fields] OR ("shoulder"[All Fields] AND "girdle"[All Fields] AND "neuropathy"[All Fields]) OR "shoulder girdle neuropathy"[All Fields]))

***2 – ELIGIBILITY CRITERIA:***

**Main Outcome**

The primary outcome of this review is mean pain measured by numerical rating scale or visual analogue scale.

**Secondary Outcomes**

1. Worst pain score measured by numerical rating scale

2. Least pain score measured by numerical rating scale

3. Pain interference on general activities by numerical scale

4. Pain interference on mood activities by numerical scale

5. Pain interference on ability to walk by numerical scale

6. Pain interference on work by numerical scale

7. Pain interference on personal relationships by numerical scale

8. Pain interference on sleep by numerical scale

9. Pain interference on life appreciation by numerical scale

10. Adverse effects: nausea and vomit measured by frequency; psychedelic symptoms measured by frequency

Studies evaluating the efficacy of ketamine in the prevention of neuropathic pain development and investigating perioperative ketamine for acute pain will be excluded;

***3 – DATA EXTRACTION FORM:***

| **Study ID (Author/year)** |
| --- |
|  |

## General Information

| **Report title**  *(title of paper/ abstract/ report that data are extracted from)* |  |
| --- | --- |
| **Report ID**  *(ID for this paper/ abstract/ report)* |  |
| **Publication type**  *(e.g. full report, abstract, letter)* |  |
| **Possible conflicts of interest**  *(for study authors)* |  |
| **Country** |  |

## Study Eligibility

| **Study Characteristics** | **Eligibility criteria**  *(Insert eligibility criteria for each characteristic as defined in the Protocol)* |
| --- | --- |
| **Type of study** |  |
| **Participants** |  |
| **Inclusion criteria** |  |
| **Exclusion criteria** |  |
| **Types of intervention** |  |
| **Outcomes** |  |
| **Follow-up time** |  |

## Participants

|  | **Description as stated in report/paper** | |
| --- | --- | --- |
| **Total no. randomized**  *(or total pop. at start of study for NRCTs)* | ketamine | Control |
| **Clusters**  *(if applicable, no., type, no. people per cluster)* |  | |
| **Withdrawals and exclusions**  *(if not provided below by outcome)* | ketamine | Control |
| **Age (Mean/SD)** | ketamine | Control |
| **Sex (Male)** | ketamine | Control |
| **Co-morbidities** | ketamine | Control |
| **Subgroups**  **(pain evaluation/routes of administration/length of treatment/ketamine routine of administration/different doses/patient’s clinical presentation)** | Subgroup (ketamine) | Subgroup (control) |

## Intervention

|  | **Description as stated in report/paper** |
| --- | --- |
| **Ketamine regimen description**  **(dose/route/duration):** | Dose: |
| Route: |
| Duration: |
| **Measured outcomes** | l |
| **Co-morbidities** |  |
| **Other treatment received** *(additional to study intervention)* |  |
| **Other relevant sociodemographics** |  |
| **Subgroups measured** |  |
| **Subgroups reported** |  |

## Risk of Bias assessment

| **Domain** | **Risk of bias** | | | **Support for judgement** |
| --- | --- | --- | --- | --- |
|  | Low risk | High risk | Unclear |  |
| **Random sequence generation**  *(selection bias)* |  |  |  |  |
| **Allocation concealment**  *(selection bias)* |  |  |  |  |
| **Blinding of participants and personnel**  *(performance bias)* |  |  |  |  |
| **Blinding of caregivers** |  |  |  |  |
| **Blinding of data collectors** |  |  |  |  |
| **Blinding of staticians** |  |  |  |  |
| **Blinding of outcome assessment** |  |  |  |  |
| **Incomplete outcome data**  *(attrition bias)* |  |  |  | **Loss to follow-up:** |
| **Selective outcome reporting?**  *(reporting bias)* |  |  |  |  |
| **Other bias** |  |  |  |  |

## Results

***Dichotomous outcome***

|  | **Description as stated in report/paper** | | | |
| --- | --- | --- | --- | --- |
| **Comparison** |  | | | |
| **Outcome** |  | | | |
| **Subgroup** |  | | | |
| **Timepoint** *(specify whether from start or end of intervention)* |  | | | |
| **Results** | **Intervention (ketamine)** | | **Control** | |
| No. events | No. participants | No. events | No. participants |
|  |  |  |  |

***Continuous outcome***

|  | | **Description as stated in report/paper** | | | | | |
| --- | --- | --- | --- | --- | --- | --- | --- |
| **Comparison** | |  | | | | | |
| **Outcome** | |  | | | | | |
| **Subgroup** | |  | | | | | |
| **Timepoint** *(specify whether from start or end of intervention)* | |  | | | | | |
| **Post-intervention or change from baseline?** | |  | | | | | |
| **Results** | **Intervention (ketamine)** | | | | **Control** | | |
| Mean | | SD (or other variance) | No. participants | Mean | SD (or other variance) | No. participants |
|  | |  |  |  |  |  |
